# Supplementary material for: Towards Integrated Care for older home-dwelling adults with depression andmultimorbidity: Patients and caregivers’ perspectives from a qualitative study
Source: Research Square preprint supplement (doi:10.21203/rs.3.rs-7199591/v1), 2025-08-18
Supplement: Supplementary file 1 [file ac791f9e556bf6d7e9838e45.docx]

# Appendices

Appendix A

Consolidated criteria for reporting qualitative studies (COREQ):

Derived from:

*Tong A, Sainsbury P, Craig J. Consolidated criteria for reporting qualitative research (COREQ): a 32-item checklist for interviews and focus groups. International Journal for Quality in Health Care. 2007. Volume 19, Number 6: pp. 349 – 357*

| Items | Description | Reported on page |
| --- | --- | --- |
| Domain 1: Research team and reflexivity | | |
| Personal Characteristics | | |
| **1. Interviewer/ facilitator** | Which author/s conducted the interview or focus group? | p. 8-9 |
| **2. Credentials** | What were the researcher’s credentials? E.g., PhD, MD | p. 8-9 |
| **3. Occupation** | What was their occupation at the time of the study? | P. 8-9 |
| **4. Gender** | Was the researcher male or female? | p. 8-9 |
| **5. Experience and training** | What experience or training did the researcher have? | p. 8-9 |
| Relationship with participants | | |
| **6. Relationship established** | Was a relationship established prior to study commencement? | p. 7-8 |
| **7. Participant knowledge of the interviewer** | What did the participants know about the researcher? E.g  personal goals, reasons for doing the research? | p. 6-7 |
| **8. Interviewer characteristics** | What characteristics were reported about the interviewer/facilitator? e.g. Bias, assumptions, reasons and interests in the research topic | p. 8-9 |
| Domain 2: study design | | |
| Theoretical framework | | |
| **9. Methodological orientation and Theory** | What methodological orientation was stated to underpin the study? e.g. grounded theory, discourse analysis, ethnography,  phenomenology, content analysis) | p.6 |
| Participant selection | | |
| **10. Sampling** | How were participants selected? e.g., purposive, convenience,  consecutive, snowball | p. 6-7 |
| **11. Method of approach** | How were participants approached? e.g., face-to-face, telephone,  mail, email | P. 6-7 |
| **12. Sample size** | How many participants were in the study? | p. 6-7 |
| **13. Non-participation Setting** | How many people refused to participate or dropped out?  Reasons? | p. 9 |
| **14. Setting of data collection** | Where was the data collected? e.g., home, clinic, workplace | p. 5-6 |
| **15. Presence of nonparticipants** | Was anyone else present besides the participants and researchers? | p. 7 |
| **16. Description of sample** | What are the important characteristics of the sample? e.g.  demographic data, date | p. 6-7 |
| Data collection | | |
| **17. Interview guide** | Were questions, prompts, and guides provided by the authors?  Was it pilot tested? | p. 7-8 |
| **18. Repeat interviews** | Were repeat interviews carried out? If yes, how many? | no |
| **19. Audio/visual recording** | Did the research use audio or visual recording to collect the data? | p. 7-8 |
| **20. Field notes** | Were field notes made during and/or after the interview or focus group? | no |
| **21. Duration** | What was the duration of the interviews or focus group? | p. 7 |
| **22. Data saturation** | Was data saturation discussed? | p. 8 |
| **23. Transcripts returned** | Were transcripts returned to participants for comment and/or  correction? | no |
| Domain 3: analysis and findings | | |
| Data analysis | | |
| **24. Number of data coders** | How many data coders coded the data? | P. 7-8 |
| **25. Description of the coding tree** | Did the authors provide a description of the coding tree? | no |
| **26. Derivation of themes** | Were themes identified in advance or derived from the data? | p.7-8 |
| **27. Software** | What software, if applicable, was used to manage the data? | p. 7-8 |
| **28. Participant checking** | Did participants provide feedback on the findings? | no |
| Reporting | | |
| **29. Quotations presented** | Were participant quotations presented to illustrate the themes/findings? Was each quotation identified? e.g., participant number | p. 9-19 |
| **30. Data and findings consistent** | Was there consistency between the data presented and the findings? | p. 9-19 |
| **31. Clarity of major themes** | Were major themes clearly presented in the findings? | P. 9-19 |
| **32. Clarity of minor themes** | Is there a description of diverse cases or a discussion of minor themes? | p. 15-19 |

## **Appendix B**

## **Interview guide for the patients**

Research question: What are your perceptions regarding the current care, and are there any improvements that could be made for the future?

Icebreaker (photo attachment I)

- What does this photo evoke in you?
- How do you feel when looking at this photo?

Current Care Sub-questions

- 1. How would you describe your relationship with your family?
  2. Can you describe your current care?
  3. Who (caregivers, family, etc.) is involved in your current care, and in what way (e.g., frequency, tasks, etc.)?
  4. Do you know if the caregivers communicate with each other (e.g., GP - psychiatrist, GP - home care, etc.)? How would you describe their communication?
  5. If yes, how does this communication happen (e.g., via phone, email, care consultations, etc.)?
  6. How do you experience the communication between your caregivers? Do you feel they are on the same page?
  7. When decisions are made, what are these decisions about?
  8. Who makes these decisions?
  9. Do your caregivers explain your treatment options and involve you in decision-making regarding your care?
  10. Do you feel heard by your caregivers regarding all of your health issues, including your depression and physical health problems?
  11. Do you feel that your caregivers consider your personal preferences and goals when planning your care?
  12. Can you communicate openly with your caregivers about your concerns or questions?
  13. Do caregivers expect the same things from you and your care? Or are they different? (If different: How do you deal with these differences?)
  14. Are there any challenges or issues in coordinating the care, in your opinion?
  15. Do you experience difficulties accessing healthcare services?
  16. Are there barriers to accessing services (such as transport, language barriers, or financial concerns)?

Future Care sub-questions

- 1. How would your care look in a perfect world, what essential elements and people (e.g., caregivers, family) must be present?
  2. How involved would you like to be in decision-making regarding your future care? Why do you think it's important to be involved in the care process?

Conclusion

- 1. Would you like to add anything?

Thank you

Interview guide with Informal Caregiver

Research question: What are your perceptions regarding the current care for elderly people with depression and physical multimorbidity, and are there any improvements that could be made for the future?

- 1. Icebreaker (photo attachment II)
  2. What does this photo evoke for you?
  3. How do you feel when looking at this photo?

Current Care sub-questions

- 1. Can you describe the current care for person X?
  2. Who (e.g., caregivers, family, etc.) is involved in the care, and in what way (e.g., frequency, tasks, etc.)?
  3. How does the collaboration between these different partners work?
  4. Do you know if the caregivers communicate with each other (e.g., GP - psychiatrist, GP - home care, etc.)? How would you describe their communication?
  5. How does the communication happen (e.g., via phone, email, care consultations, etc.)?
  6. When decisions are made, what are these decisions about?
  7. Who makes these decisions?
  8. To what extent are you as an informal caregiver involved in decisions regarding the patient’s care? And at what points in time?
  9. Are there any challenges or issues in coordinating the care, in your opinion?
  10. Do you experience difficulties accessing healthcare services?
  11. Are there barriers to accessing services (such as transport, language barriers, or financial concerns)?

Future Care sub-questions

- 1. How would you envision care in a perfect world, and which essential elements/people must be present without exception?
  2. Are there any problems that are currently not being addressed in the care that you would like to discuss in the future?
  3. Would you like to be involved in the care in a different way in the future? If yes, how?

Conclusion

- 1. Would you like to add anything?

Thank you
